# Supplementary material
Source: PubMed Central journal article supplement (PMC2922553)
Supplement: 1009419107_pnas.201009419SI.pdf [file 1009419107_pnas.201009419SI.pdf]

# Supporting Information

Vasan et al. 10.1073/pnas.1009419107

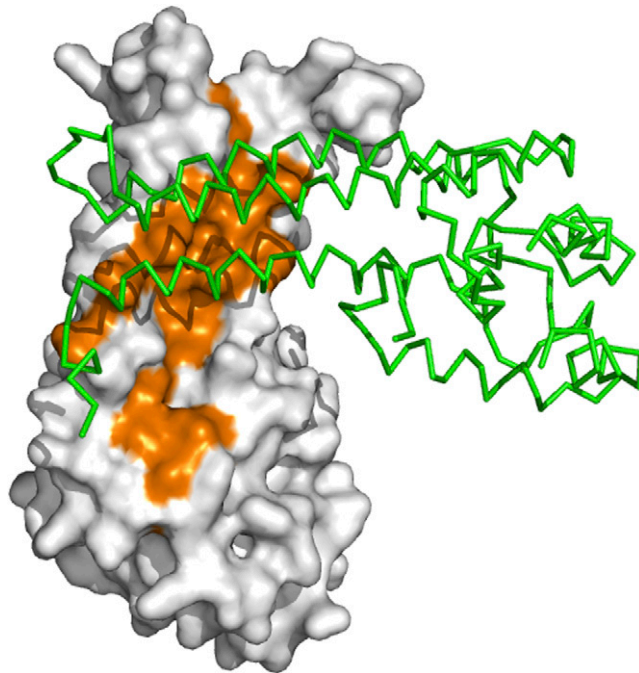

**Fig. S1.** In the crystal lattice, the hydrophobic region (orange) is buried in the interface with another, symmetry-related molecule. This interaction is not maintained in solution, where the C-terminal fragment of Vps53 behaves as a monomer.

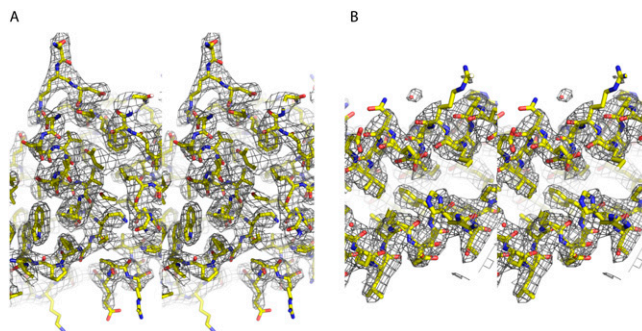

**Fig. S2.** Experimental electron density map contoured at  $1.0 \sigma$  and shown in stereo. The final, refined model is also shown. (A) A portion of the more C-terminal helical bundle. (B) A portion of the "stem."
